# Supplementary material for: A deep learning approach to automatic teeth detection and numbering based on object detection in dental periapical films
Source: PubMed Central journal article supplement (PMC6405755; doi:10.1038/s41598-019-40414-y), 2019-03-07
Supplement: 41598_2019_40414_MOESM1_ESM.pdf [file 41598_2019_40414_MOESM1_ESM.pdf]

## 北京大学口腔医院生物医学伦理委员会 伦理审查批件

伦理审查批件号：PKUSSIRB-201837103

|                                                                                                                                                                                                                                                                                                                                                                                                                                                                                                                                                                                                                       |                                                                                      |                                                           |    |
|-----------------------------------------------------------------------------------------------------------------------------------------------------------------------------------------------------------------------------------------------------------------------------------------------------------------------------------------------------------------------------------------------------------------------------------------------------------------------------------------------------------------------------------------------------------------------------------------------------------------------|--------------------------------------------------------------------------------------|-----------------------------------------------------------|----|
| 受理号                                                                                                                                                                                                                                                                                                                                                                                                                                                                                                                                                                                                                   | 2018-02-37-18                                                                        |                                                           |    |
| 项目名称                                                                                                                                                                                                                                                                                                                                                                                                                                                                                                                                                                                                                  | 口腔 X 线图像智能识别算法研究及应用评价                                                                |                                                           |    |
| 项目负责人                                                                                                                                                                                                                                                                                                                                                                                                                                                                                                                                                                                                                 | 陈虎                                                                                   |                                                           |    |
| 审查类别                                                                                                                                                                                                                                                                                                                                                                                                                                                                                                                                                                                                                  | 初始审查                                                                                 | 审查方式                                                      | 快审 |
| 审查日期                                                                                                                                                                                                                                                                                                                                                                                                                                                                                                                                                                                                                  | 2018-04-03                                                                           | 审查地点                                                      |    |
| 审查委员                                                                                                                                                                                                                                                                                                                                                                                                                                                                                                                                                                                                                  | 冯海兰、周永胜、甘业华、赵玉鸣                                                                      |                                                           |    |
| 审查文件                                                                                                                                                                                                                                                                                                                                                                                                                                                                                                                                                                                                                  | 详见附件“审查文件清单”                                                                         |                                                           |    |
| <p><b>审查意见：</b></p> <p>依据《中华人民共和国执业医师法》、《医疗机构管理条例》、《药物临床试验质量管理规范》、《涉及人的生物医学研究伦理审查办法》（试行）、《药物临床试验伦理审查工作指导原则》、世界医学会《赫尔辛基宣言》、世界卫生组织《生物医学研究审查伦理委员会操作指南》、国际医学科学组织委员会《涉及人的生物医学研究国际伦理准则》等法律、法规、规章、规范性文件和国际准则，经本伦理委员会审查，同意按研究方案开展本研究。</p> <p>请遵循伦理委员会批准的方案开展临床研究，保护受试者的健康与权利。</p> <ol style="list-style-type: none"> <li>1. 研究过程中若变更主要研究者，对临床研究方案、知情同意书、招募材料等的任何修改，请提交修正案审查申请；</li> <li>2. 发生严重不良事件，请及时提交严重不良事件报告。紧急报告之后，请尽快提交详细的严重不良事件随访报告；</li> <li>3. 当出现任何可能显著影响试验进行、或增加受试者危险的情况时，请立即向伦理委员会提交书面报告；</li> <li>4. 研究者没有遵从方案开展研究，可能对受试者的权益/健康、以及研究的科学性造成不良影响，请提交违背方案报告；</li> <li>5. 申请人暂停或提前终止临床研究，请及时提交暂停/终止研究报告。</li> </ol> |                                                                                      |                                                           |    |
| 持续审查频率                                                                                                                                                                                                                                                                                                                                                                                                                                                                                                                                                                                                                | 一年                                                                                   | 注：请在截止日期前至少 1 个月提交研究进展报告。                                 |    |
| 批件有效期                                                                                                                                                                                                                                                                                                                                                                                                                                                                                                                                                                                                                 | 一年                                                                                   | 注：本批件从批准之日起开始生效，效期为 1 年，请在有效期满前一个月提交持续审查报告或结题报告，换取新的有效批件。 |    |
| 研究总结报告                                                                                                                                                                                                                                                                                                                                                                                                                                                                                                                                                                                                                | 研究结束时，请提交总结报告。                                                                       |                                                           |    |
| 主任委员签字<br>签署日期                                                                                                                                                                                                                                                                                                                                                                                                                                                                                                                                                                                                        |  |                                                           |    |
